# Supplementary material
Source: Research Square preprint supplement (doi:10.21203/rs.3.rs-10312225/v1)
Supplement: Supplementary file 1 [file 2e25649ae4842254c51b6d7d.docx]

## Descriptive Statistics

**Table 1: Descriptive Statistics (N = 1,320 Hospital-Year Observations)**

| **Variable** | **Mean** | **SD** | **Minimum** | **Maximum** |
| --- | --- | --- | --- | --- |
| Cost Leakage Index | 0.312 | 0.089 | 0.104 | 0.641 |
| Labour-Cost Ratio | 0.528 | 0.091 | 0.341 | 0.742 |
| Supply-Cost Ratio | 0.176 | 0.046 | 0.082 | 0.318 |
| Administrative-Cost Ratio | 0.142 | 0.038 | 0.061 | 0.291 |
| Occupancy Rate | 72.8 | 10.7 | 43.1 | 96.4 |
| Average Length of Stay | 5.8 | 1.6 | 2.8 | 11.2 |
| Discharge Productivity | 0.874 | 0.114 | 0.502 | 1.241 |
| Revenue-Cycle Efficiency | 0.832 | 0.092 | 0.541 | 0.961 |
| Operating Margin (%) | 2.4 | 4.7 | -12.8 | 11.6 |

The descriptive analysis revealed that hospitals experienced significant variations in labour costs, operational expenses, occupancy rates, and financial performance during the study period. The findings also indicated that labour expenses made up one of the largest parts of hospital operating expenditure. This result aligns with earlier studies that point to the financial load tied to healthcare workforce management (Gidwani et al., 2023). The analysis went further and showed there were major differences in average length of stay and in occupancy rates across hospitals, which may imply unequal operational efficiency and patient flow stewardship.

## 4.3 Correlation Analysis

**4.2 Correlation Analysis**

**Table 2: Pearson Correlation Matrix**

| **Variable** | **CLI** | **LCR** | **SCR** | **ACR** | **OR** | **ALOS** | **DP** | **RCE** |
| --- | --- | --- | --- | --- | --- | --- | --- | --- |
| CLI | 1.000 |  |  |  |  |  |  |  |
| LCR | 0.684 | 1.000 |  |  |  |  |  |  |
| SCR | 0.592 | 0.416 | 1.000 |  |  |  |  |  |
| ACR | 0.611 | 0.502 | 0.478 | 1.000 |  |  |  |  |
| OR | -0.521 | -0.328 | -0.214 | -0.302 | 1.000 |  |  |  |
| ALOS | 0.573 | 0.311 | 0.248 | 0.391 | -0.402 | 1.000 |  |  |
| DP | -0.566 | -0.278 | -0.195 | -0.234 | 0.623 | -0.511 | 1.000 |  |
| RCE | -0.629 | -0.341 | -0.302 | -0.482 | 0.471 | -0.421 | 0.502 | 1.000 |

The correlation analysis showed positive link between labour-cost intensity and cost leakage, so basically, when labour-cost burdens were higher, hospitals often had more operational inefficiencies , and also more financial pressure it seems. Then supply-cost escalation had a clear positive association too, which implies that not-so-smooth purchasing and inventory management help drive hidden monetary losses, in a pretty substantial way. Meanwhile the occupancy rate looked different, it showed a negative relationship with cost leakage, meaning hospitals with stronger bed utilization generally run with fewer operational inefficiencies , and the cost leakage stays lower too.

## 4.4 Regression Analysis

**Table 3: Determinants of Hospital Cost Leakage**

| **Variables** | **Coefficient** | **Std. Error** | **t-value** | **p-value** |
| --- | --- | --- | --- | --- |
| Labour-Cost Ratio | 0.312 | 0.041 | 7.61 | 0.000 |
| Supply-Cost Ratio | 0.214 | 0.037 | 5.78 | 0.000 |
| Administrative-Cost Ratio | 0.256 | 0.039 | 6.56 | 0.000 |
| Occupancy Rate | -0.173 | 0.028 | -6.18 | 0.000 |
| Average Length of Stay | 0.198 | 0.033 | 6.00 | 0.000 |
| Discharge Productivity | -0.229 | 0.034 | -6.74 | 0.000 |
| Revenue-Cycle Efficiency | -0.307 | 0.038 | -8.08 | 0.000 |

Model Statistics:

- R² = 0.742
- F-statistic = 146.31
- p < 0.001

The regression analysis showed that labour-cost intensity significantly increases hospital cost leakage a bit. This result backs up the idea that excessive staffing costs, and inefficient workforce placement, may help explain hidden budget losses inside healthcare institutions. Also the supply-cost ratio was found to affect cost leakage quite significantly too. Hospitals that run weaker procurement processes, and that have higher supply spending, tended to show more financial inefficiencies overall. Average length of stay had a positive and statistically meaningful impact on cost leakage. So when patient stays get prolonged, hospitals usually face higher operational expenses and also weaker throughput productivity. On the other hand, the occupancy rate showed a negative relationship with cost leakage. In other words, when occupancy performance is stronger the hospital often gains smoother operations, and it reduces cost wastage. Revenue-cycle efficiency in particular significantly reduced cost leakage. Hospitals with better billing , coding, and reimbursement practices generally end up with stronger financial resilience.
